# Supplementary material for: Bottom-up synthesis of bright fluorescent, moisture-resistant methylammonium lead bromide@poly(3-bromothiophene)
Source: Royal Society of Chemistry journal article supplement (doi:10.1039/c9nj04734d), 2020-01-01
Supplement: c9nj04734d1.pdf [file c9nj04734d1.pdf]

## Supporting Information

### **Bottom-up Synthesis of Bright Fluorescent, Moisture-resistant Methylammonium Lead Bromide@Poly(3-bromothiophene)**

*Soumen Sardar,<sup>#a</sup> Atanu Jana,<sup>#b</sup> Avik Mukherjee,<sup>a</sup> Anamika Dhara,<sup>c</sup> Abhijit Bandyopadhyay<sup>\*a</sup>*

<sup>#</sup>These authors contributed equally.

**Figure S1.**Degradation of bulk MAPbBr<sub>3</sub> in water

**Figure S2.**Colloidal stability of MAPbBr<sub>3</sub> NCs and MAPbBr<sub>3</sub>@PTBr nanocomposite in different organic solvents

**Figure S3.**PXRD of bulk MAPbBr<sub>3</sub>

**Figure S4.**FTIR spectra of CTAB and the FTIR of PTBr

**Figure S5.**SEM image and elemental mapping for bulk MAPbBr<sub>3</sub>

**Figure S6.**SEM image and elemental mapping for MAPbBr<sub>3</sub>NCs

**Figure S7.**SEM image and elemental mapping for MAPbBr<sub>3</sub>@PtBr.

**Figure S8.**Stability test of MAPbBr<sub>3</sub> NCs in different amount (%) of water in toluene solvent.

Water content from right to left in % and total volume 1 ml

**Figure S9.**Stability test of MAPbBr<sub>3</sub>@PTBr nanocomposite in different amount (%) of water in toluene solvent. Water content from right to left in % and total volume 1 ml

**Figure S10.** UV and PL spectra of PbBr<sub>2</sub> and MAPbBr<sub>3</sub> in DMF solvent medium for confirming the synthesis method.

**Figure S11.**The PL study after six months to check the stability in humidity.

**Table S1.**Fluorescence lifetimes of MAPbBr<sub>3</sub> NCs and MAPbBr<sub>3</sub>@PTBr in toluene.

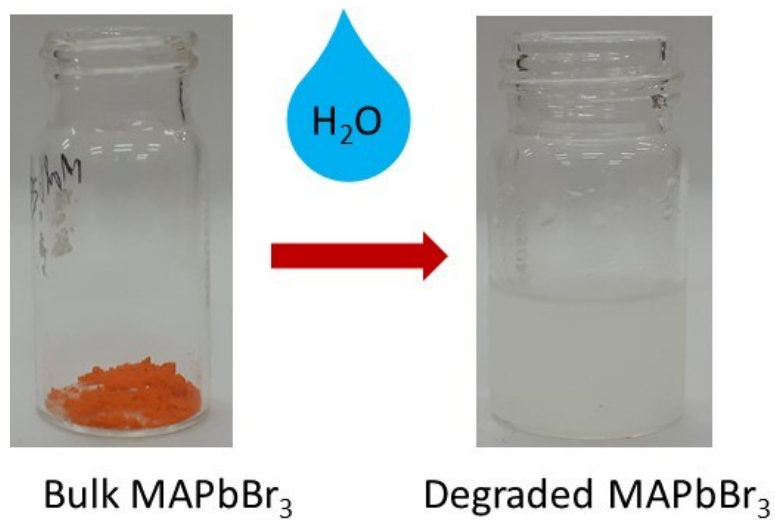

**Figure S1.** Degradation of bulk MAPbBr<sub>3</sub> in water. Bulk MAPbBr<sub>3</sub> degraded quickly in presence of water.

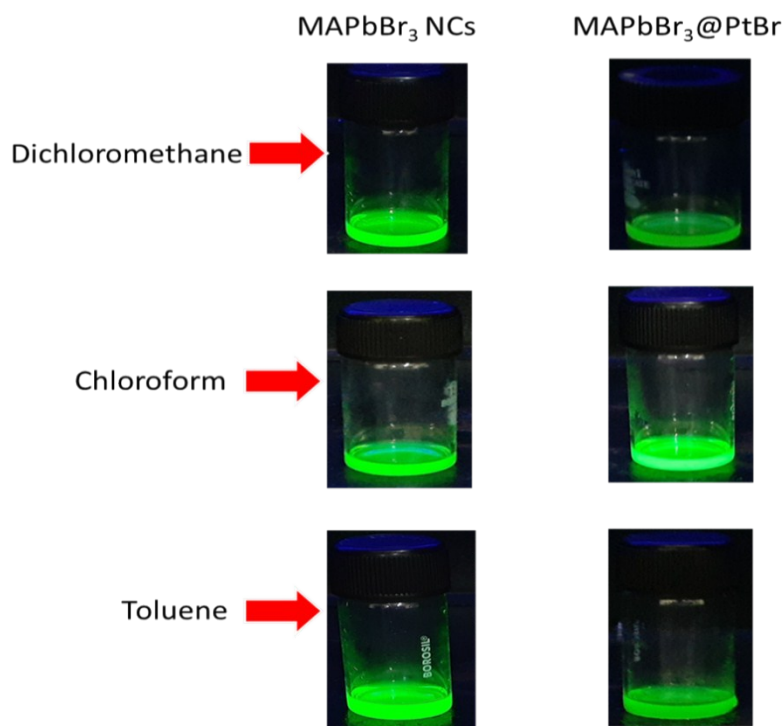

**Figure S2.** Colloidal stability of MAPbBr<sub>3</sub> NCs and MAPbBr<sub>3</sub>@PtBr nanocomposite in different organic solvents. All the images were taken under UV light.

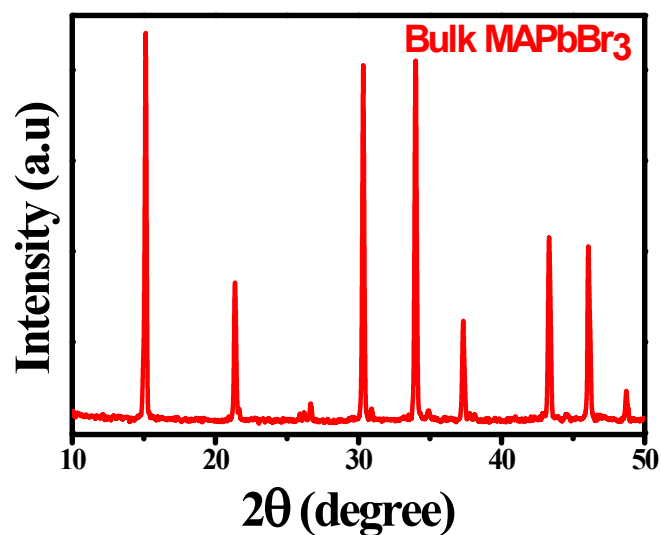

Figure S3. XRD of our as-synthesized bulk MAPbBr<sub>3</sub>.

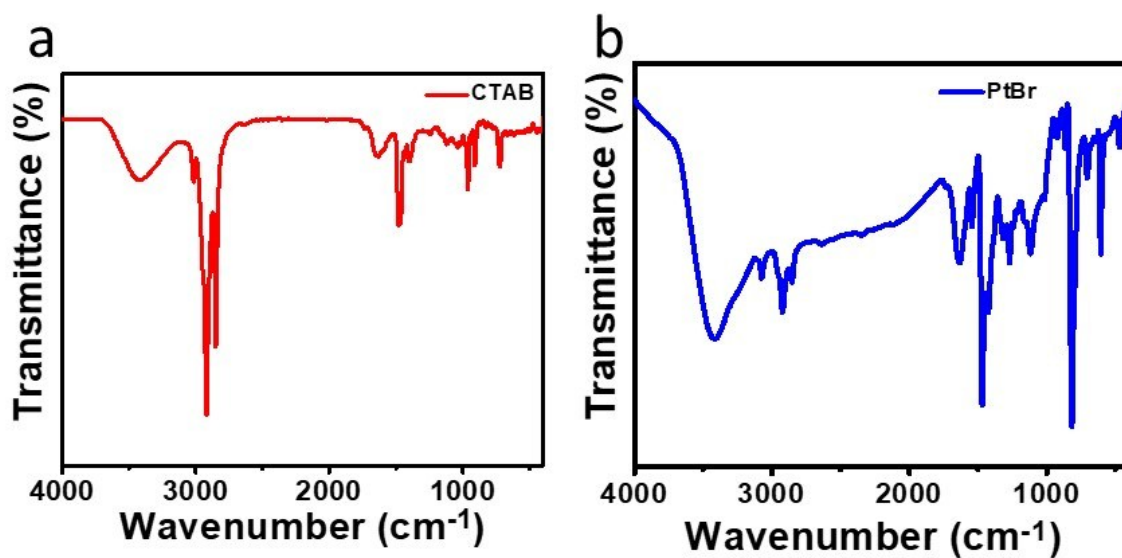

Figure S4. FTIR spectra of (a) CTAB and (b) PtBr. The corresponding FTIR peaks of CTAB and PtBr are present in MAPbBr<sub>3</sub>@PtBr nanocomposite.

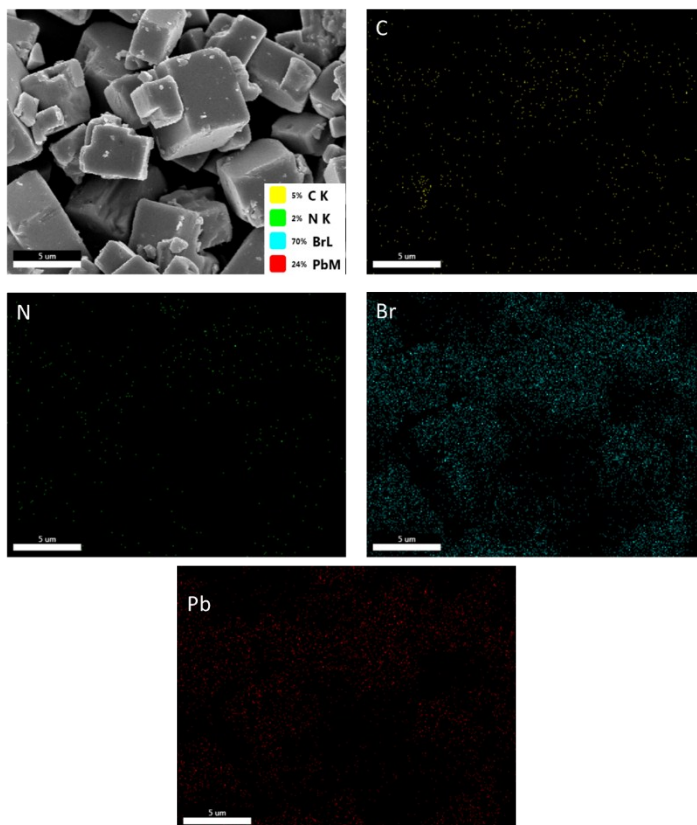

**Figure S5.**SEM image and elemental mapping for bulk MAPbBr<sub>3</sub>

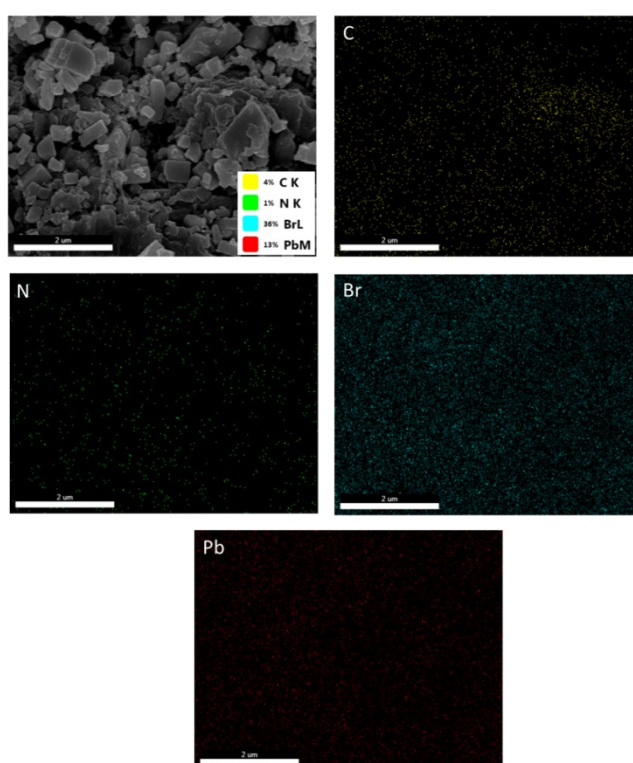

**Figure S6.**SEM image and elemental mapping for MAPbBr<sub>3</sub> NCs

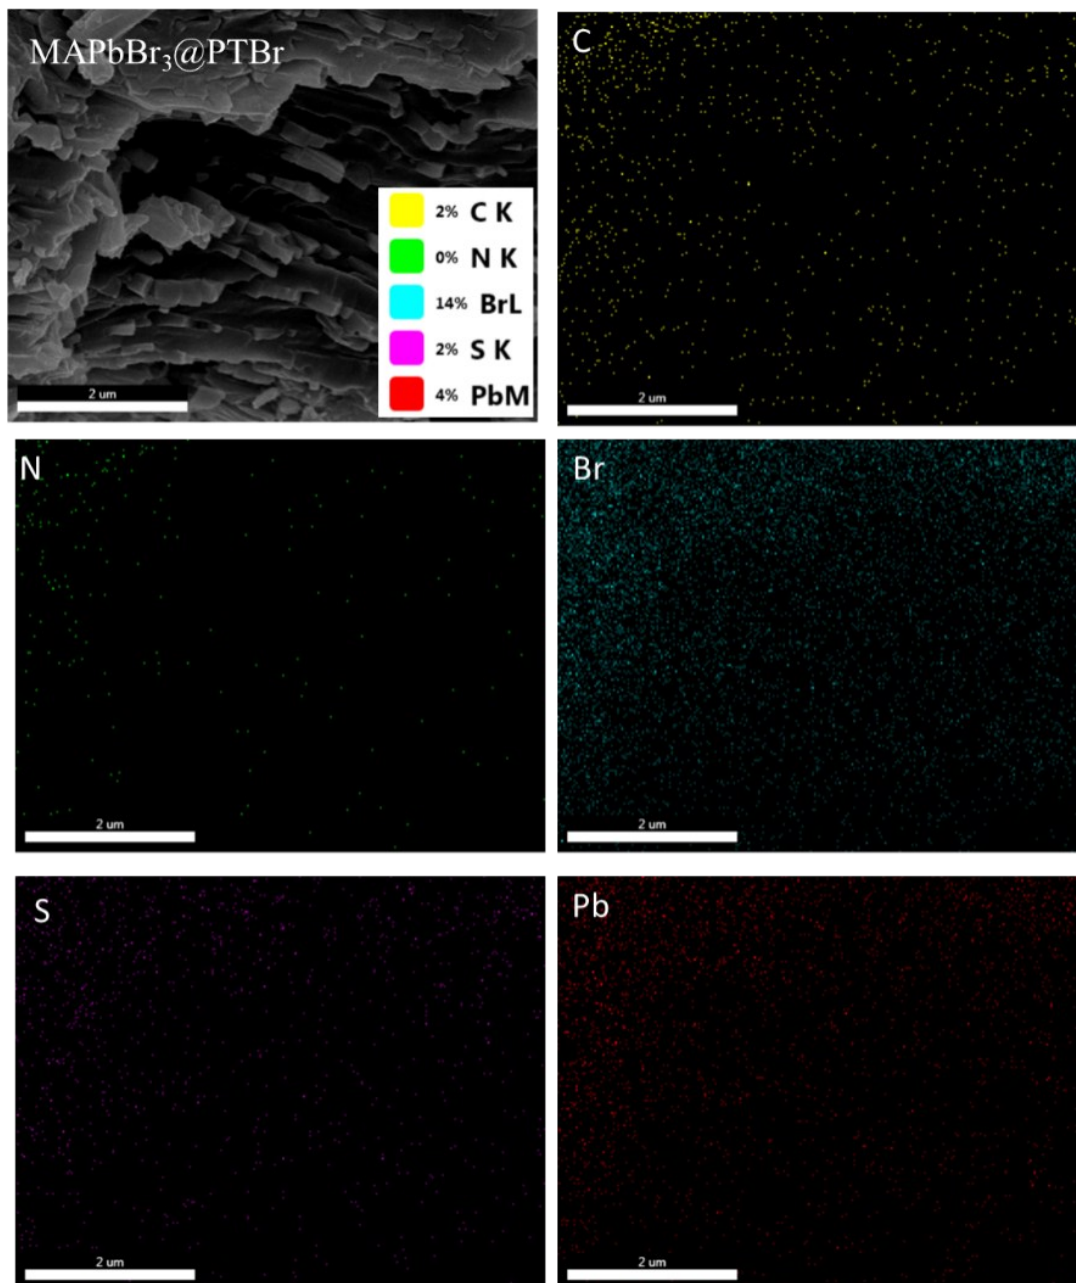

**Figure S7.** SEM image and elemental mapping for MAPbBr<sub>3</sub>@PTBr.

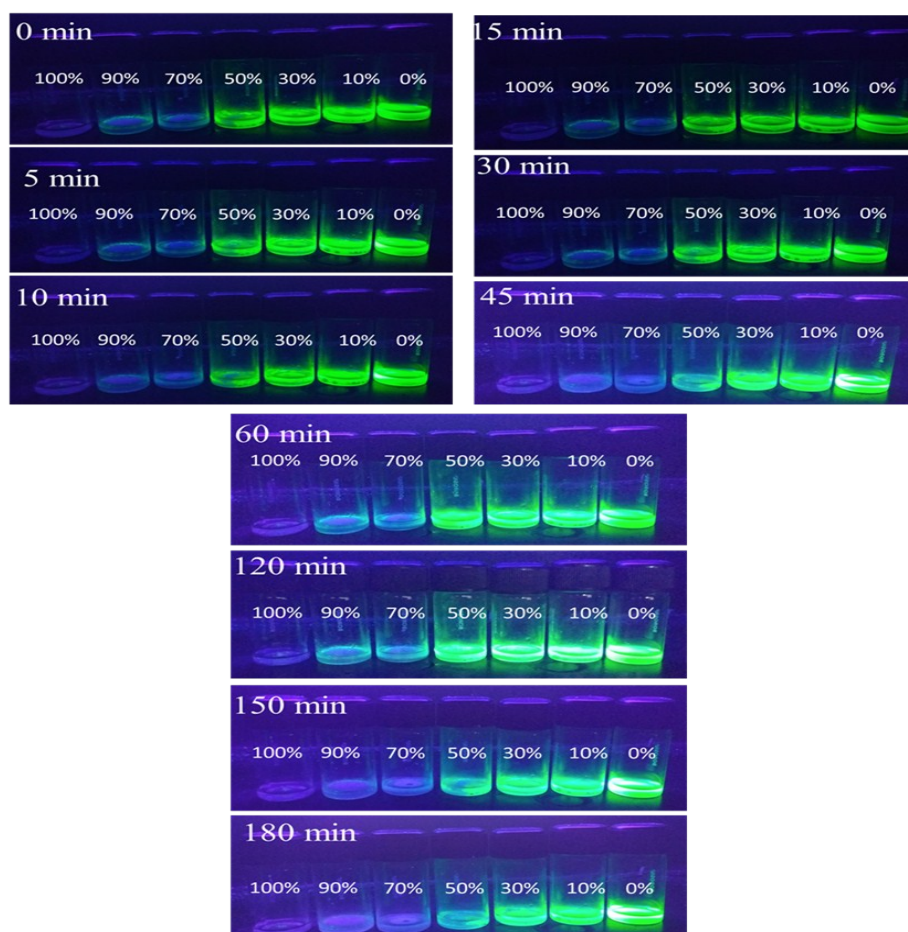

**Figure S8.** Stability test of MAPbBr<sub>3</sub> NCs in different amount (%) of water in toluene solvent.

Water content from right to left in % and total volume 1 ml.



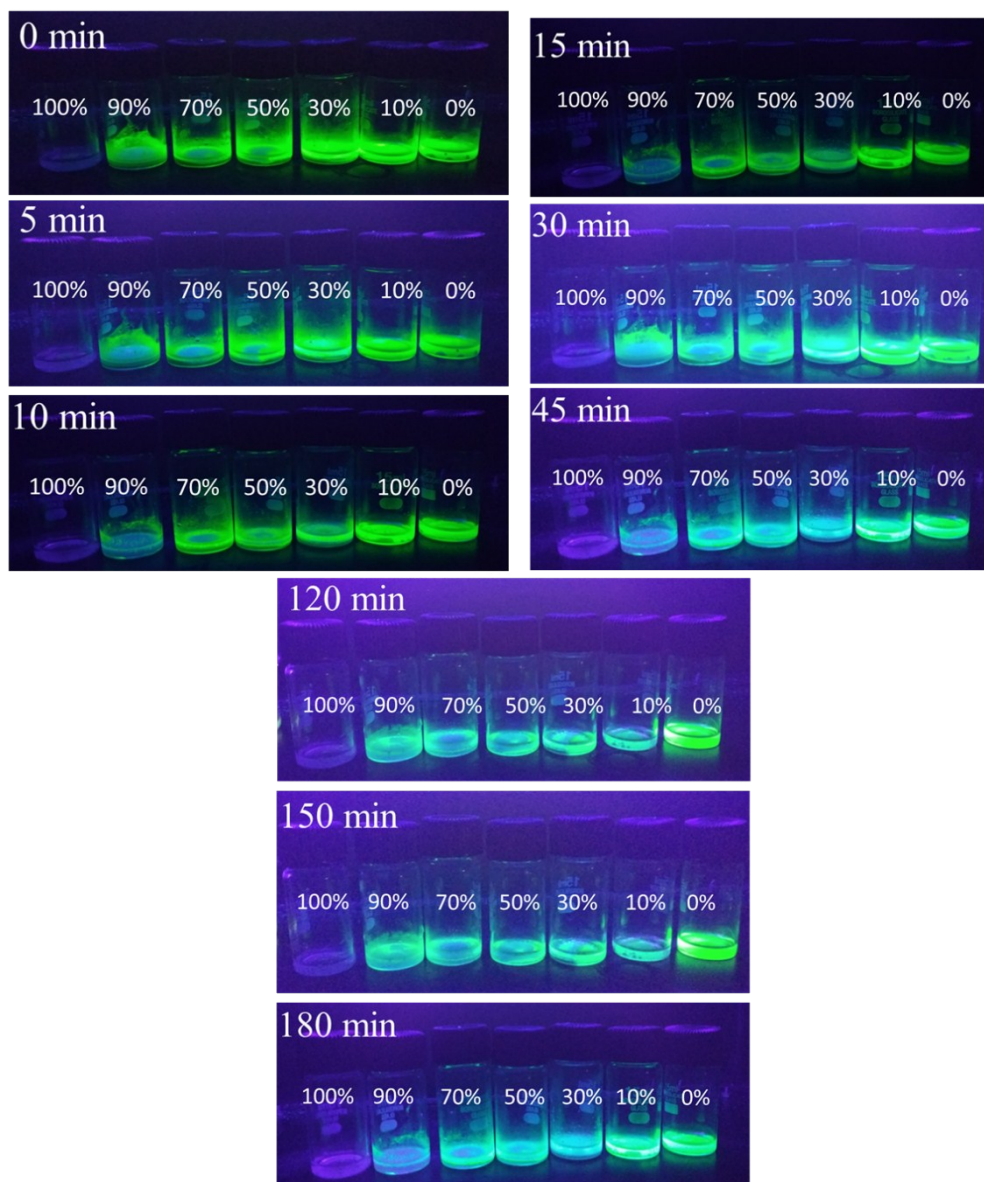

**Figure S9.** Stability test of MAPbBr<sub>3</sub>@PTBr nanocomposite in different amount (%) of water in toluene solvent. Water content from right to left in % and total volume 1 ml.

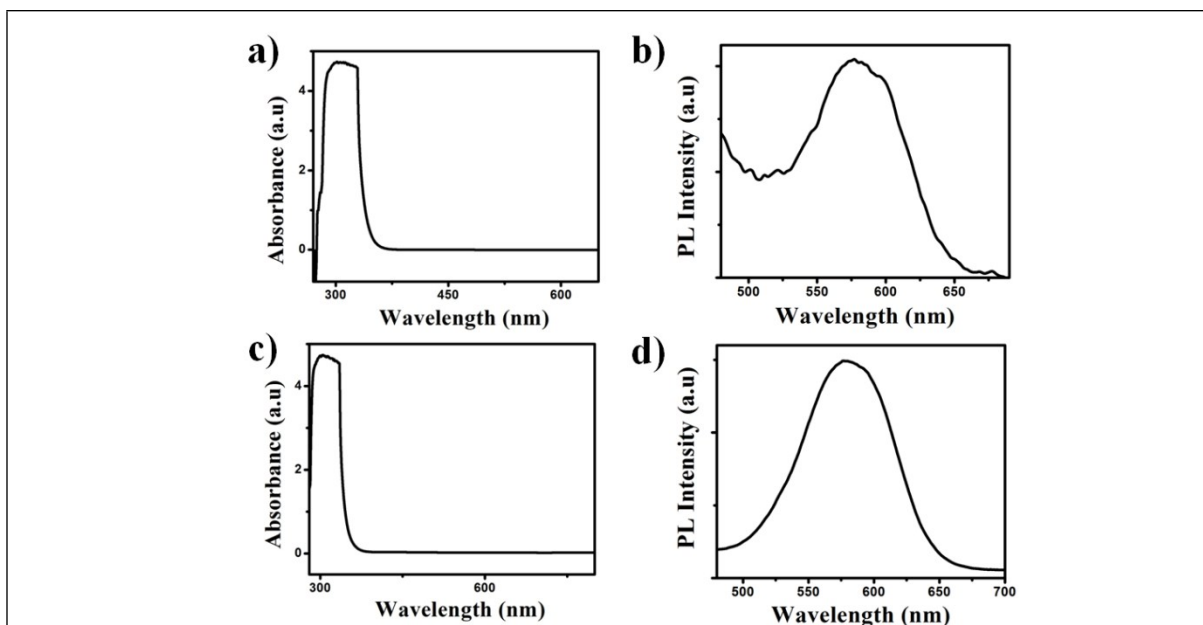

**Figure S10.** a) UV absorption of PbBr<sub>2</sub> b) Photoluminescence (PL) spectra of PbBr<sub>2</sub> c) UV absorption of MAPbBr<sub>3</sub> d) Photoluminescence (PL) spectra of MAPbBr<sub>3</sub> in DMF solvent.

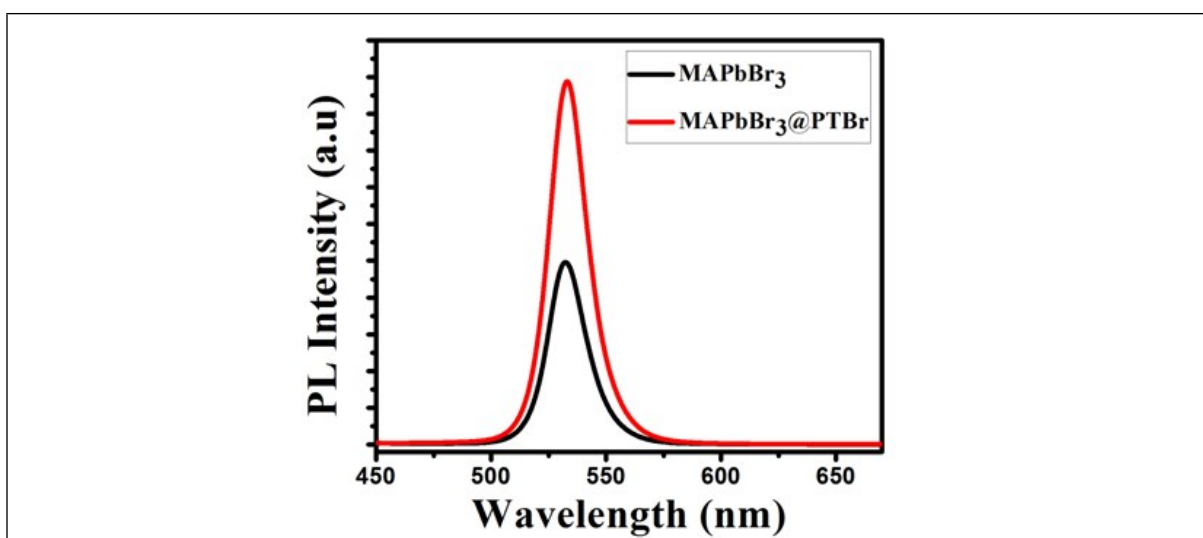

**Figure S11.** The PL study after six months of MAPbBr<sub>3</sub> and MAPbBr<sub>3</sub>@PTBr to check the stability in humidity.

**Table S1.** Fluorescence lifetimes of MAPbBr<sub>3</sub> NCs and MAPbBr<sub>3</sub>@PTBr in toluene

| Compounds in toluene      | $\tau_1$ (ns) | $\tau_2$ (ns) | $\tau_3$ (ns) | $\alpha_1$ | $\alpha_2$ | $\alpha_3$ | $\chi^2$ | $\tau_{av}$ |
|---------------------------|---------------|---------------|---------------|------------|------------|------------|----------|-------------|
| MAPbBr <sub>3</sub> NCs   | 21.4          | 1.03          | 0.17          | 0.01       | 0.04       | 0.94       | 0.99     | 5.18        |
| MAPbBr <sub>3</sub> @PTBr | 1.07          | 22.20         | 0.17          | 0.04       | 0.01       | 0.94       | 0.99     | 6.23        |
